# Supplementary material
Source: PubMed Central journal article supplement (PMC3733554)
Supplement: NIHMS492869-supplement-03.pdf [file NIHMS492869-supplement-03.pdf]

**Table S3. List of Antibodies Used in This Study, Related to Extended Experimental Procedures**

| <b><i>Epitope</i></b>                  | <b><i>Provider</i></b>       | <b><i>Catalog Number</i></b> |
|----------------------------------------|------------------------------|------------------------------|
| Cleaved caspase-3 (Asp175)             | Cell Signaling Technology    | 9661                         |
| E2A (Yae, western blotting)            | Santa Cruz Biotechnology     | sc-416                       |
| E2A (V18, ChIP)                        | Santa Cruz Biotechnology     | sc-349X                      |
| Nucleolin (C-23, MS-3)                 | Santa Cruz Biotechnology     | sc-8031                      |
| p21 (187, western blotting)            | Santa Cruz Biotechnology     | sc-817                       |
| p21 (F-5, flow cytometry)              | Santa Cruz Biotechnology     | sc-6246                      |
| p53 (DO-1, ChIP, western blotting)     |                              | OP43                         |
| PUMA $\alpha/\beta$ (H-136)            | Santa Cruz Biotechnology     | sc-28226                     |
| Tubulin (DM1A)                         | Sigma-Aldrich                | T9026                        |
| TRIAP1-p53CSV (C-17)                   | Santa Cruz Biotechnology     | sc-139544                    |
| BrdU (MoBU-1)                          | Santa Cruz Biotechnology     | sc-51514                     |
| RNAPII (H2124, ChIP)                   | Santa Cruz Biotechnology     | sc-9001X                     |
| RNAPII – S2P (H5, ChIP)                | Covance                      | MMS-129R                     |
| RNAPII – S5P (H14, ChIP)               | Covance                      | MMS-134R                     |
| Alexa Fluor 647 donkey anti-mouse IgG  | Life Technologies/Invitrogen | A10043                       |
| Alexa Fluor 488 donkey anti-rabbit IgG | Life Technologies/Invitrogen | A21206                       |
| Alexa Fluor 488 donkey anti-mouse IgG  | Life Technologies/Invitrogen | A21202                       |
| Alexa Fluor 680 donkey anti-rabbit IgG | Life Technologies/Invitrogen | A31571                       |
| Donkey anti-mouse IgG IRDye 800CW      | Odyssey                      | 926-32212                    |
| Goat anti-mouse IgG-HRP                | Santa Cruz Biotechnology     | sc-2005                      |
| Goat anti-rabbit IgG-HRP               | Santa Cruz Biotechnology     | sc-2317                      |
| Normal mouse IgG (isotype control)     | Santa Cruz Biotechnology     | sc-2025                      |
| Normal rabbit IgG (isotype control)    | Santa Cruz Biotechnology     | sc-3888                      |
| Anti-IgM (ChIP)                        | Sigma-Aldrich                | M8644                        |
